# Supplementary material for: Target-switched artificial biochemical circuit for a versatile and sensitive colorimetric detection platform
Source: Royal Society of Chemistry journal article supplement (doi:10.1039/d3cc01765f), 2023-01-01
Supplement: d3cc01765f1.pdf [file d3cc01765f1.pdf]

## Supplementary Material

### Target-switched artificial biochemical circuit for a versatile and sensitive colorimetric detection platform

Xianzhu Meng<sup>a</sup>, Huiwen Gu<sup>a</sup>, Xiaoli Yin<sup>b</sup>, Hongchao Yi<sup>a</sup>, Ying Chen<sup>a\*</sup>

<sup>a</sup> *College of Chemistry and Environmental Engineering, Yangtze University, Jingzhou, 434023, China*

<sup>b</sup> *College of Life Sciences, Yangtze University, Jingzhou 434025, China*

\* Corresponding author: Ying Chen

*E-mail address:* yingatswu@126.com (Y. Chen)

*Tel.:* +86-716-8060693 (Y. Chen)

#### S1 Experimental section

##### *S1.1 Materials and apparatus*

Vent (exo-) DNA polymerase supplied with 10× ThermoPol buffer (20 mM Tris-HCl, 10 mM KCl, 10 mM (NH<sub>4</sub>)<sub>2</sub>SO<sub>4</sub>, 2 mM Mg(SO<sub>4</sub>)<sub>2</sub>, 0.1% Triton X-100, pH 8.8 @ 25 °C), Nt.BstNBI supplied with 10× NEBuffer (50 mM Tris-HCl, 100 mM NaCl, 10 mM MgCl<sub>2</sub>, 100 μg mL<sup>-1</sup> BSA (pH 7.9 @ 25 °C) and the deoxynucleotide triphosphates (dNTPs) mixture were obtained from New England Biolabs (Beijing, China). Dimethyl sulfoxide (DMSO), CHCl<sub>3</sub>, and C<sub>2</sub>H<sub>5</sub>OH were purchased from Sinopharm Chemical Reagent Co., Ltd (Shanghai, China). H<sub>2</sub>O<sub>2</sub> was purchased from Tianli Chemical Reagent Co., Ltd (Tianjin, China). Hemin, 2,2-azino-bis(3-ethylbenzothiazoline-6-sulfonic acid) (ABTS<sup>2-</sup>) were purchased from Yuanye Bio-Technology Co., Ltd

(Shanghai, China). The hemin stock solution (10  $\mu$ M) was dissolved in DMSO and stored at -20 °C for further use. All oligonucleotides were synthesized and HPLC-purified by Sangon Biological Engineering and Technology & Services Co., Ltd. (Shanghai, China). The sequences were listed in Table S1.

**Table S1** Sequences of the synthetic oligonucleotides

| Nucleic Acid ID | Sequence (5'-3')                                                                                                                              |
|-----------------|-----------------------------------------------------------------------------------------------------------------------------------------------|
| target DNA      | CGT AAG TCT CCG AGG TTG CCA TCG ATG ATT TGA ACT                                                                                               |
| MH              | <b>GAT GGC AAC CTC GGA GAC TTA CGG</b> AGG <u>GAC TCG</u> <b>CGT</b><br><b>AGG TAC</b> TAA <b>CGT AAG TCT CCG</b> ATT <b>ACC TAC GC</b>       |
| template        | AAT GCC CAA CCC GCC CTA CCC ACG AGA CTG <u>ACT CCG</u> ATG<br>GCA ACC TCG GAG ACT TAC GGA CTG <u>ACT CCG</u> ATG GCA ACC<br>TCG GAG ACT TAC G |
| m2-DNA          | CGT AAG TCT CCG <b>ACG TTC</b> CCA TCG ATG ATT TGA ACT                                                                                        |
| m3-DNA          | CGT <b>TAG</b> TCT CCG <b>ACG TTC</b> CCA TCG ATG ATT TGA ACT                                                                                 |
| non-cDNA        | GAT GAA GTT CAA ATC ATC GAT GGC AAC CTC GGA GAC                                                                                               |

The bold sequence is the target-specific recognition domain. The underlined bases are the antisense sequences of specific fragments for Nt.BstNBI recognition. The sequences marked in the same color are complementary sequences. The mismatched positions in m2-DNA and m3-DNA are marked in red.

The preparation of hairpin probes was accomplished with a GeneAmp<sup>®</sup> PCR system 9700 (Applied Biosystems, USA). The UV-Vis absorption spectra were collected with a UV-2600 spectrophotometer (Shimadzu, Japan) at room temperature in the wavelength range of 390 nm to 500 nm. The RGB values were analyzed by the Color Recognizer APP (Xiyi Technology) loaded from the APP store.

### *S1.2 Self-primed cascading isothermal EXPAR*

Prior to use, the MH oligonucleotides were annealed to form hairpin structures. The self-primed EXPAR was accomplished by separate preparation of solutions A and B on an ice bath followed by mixing and incubating both solutions. 10  $\mu$ L of solution A consisted of 200 nM MH, 500  $\mu$ M dNTPs, 0.5 $\times$  NEBuffer, and targets at various

concentrations. Solution B (10  $\mu\text{L}$ ) was composed of 0.8 U  $\mu\text{L}^{-1}$  Nt.BstNBI endonuclease, 0.2 U  $\mu\text{L}^{-1}$  Vent (exo-) DNA polymerase, and 300 nM template in 1 $\times$  ThermoPol buffer. The same volume of solutions A and B were mixed to a total volume of 20  $\mu\text{L}$  and incubated at 55  $^{\circ}\text{C}$  for 40 min. Finally, the resulting mixture containing EXPAR product was diluted to 80  $\mu\text{L}$  for colorimetric analysis.

### *S1.3 The smartphone-integrated colorimetric measurement*

The hemin/G DNAzyme was formed via the combination between hemin and the G-rich sequence from the EXPAR product by the addition of hemin (10  $\mu\text{M}$ , 5  $\mu\text{L}$ ) into the EXPAR product (80  $\mu\text{L}$ ) and incubation at room temperature for 1 h. Next, the freshly prepared 25  $\mu\text{L}$  of  $\text{H}_2\text{O}_2$  (10 mM) and 25  $\mu\text{L}$  of ABTS<sup>2-</sup> (20 mM) were added into the resulting solution, followed by incubation at room temperature for 15 min to accomplish the DNAzyme-catalyzed chromogenic reaction. The obtained solution was photographed with a smartphone, followed by the RGB values readout of the captured image by an installed APP. Then, the reaction solution was transferred to a quartz cell and placed in the spectrophotometer for measurement scanning from 390 to 500 nm. The UV-Vis absorption spectra showed a characteristic absorbance at 420 nm, which was employed to evaluate the target concentration-defined performance of our biosensor. In this way, the smartphone-integrated dual-readout colorimetric analysis of the target DNA was realized.

### *S1.4 Non-denaturing polyacrylamide gel electrophoresis (PAGE)*

Different samples were loaded into the notches of the freshly prepared non-denaturing polyacrylamide gel (16%), and electrophoresis was performed at 100 V for

50 min in  $1 \times$  TBE buffer. After dyeing with gelred, the gel was transferred to a dark box where the electrophoresis image was taken using a digital camera under UV light.

## **S2 Results and discussion**

### *The detailed principle of our proposed method*

In this protocol, we proposed a novel colorimetric sensing platform based on the target-induced structure switch of a MH followed by self-primed cascade EXPAR to produce tremendous hemin/G DNAzyme for highly efficient signal amplification with the employment of spectrophotometer and smartphone as detection tools. The principle is demonstrated in Scheme 1. As shown in part A, MH was rationally designed with different domains including the hanging self-primer domain, the complementary sequence of self-primer and the nicking endonuclease (Nt.BstNBI)-specific recognition site in the loop, and the target recognition domain enclosing in the stem at its 5'-end. In the absence of the target DNA, MH is in an inactive configuration with its self-primer and a toehold sequence overhanging away from the stem as single-stranded DNAs (ssDNAs), leading to the EXPAR inhibition. Once the target DNA is present, it hybridizes with the target-specific recognition domain via the toehold-mediated strand displacement reaction, inducing the structure switch of MH to an activated configuration. In this state, the self-primer can hybridize with its complementary sequence to enable its extension along the MH track assisted by DNA polymerase, which results in the formation of a Nt.BstNBI-specific recognition sequence and the release of target to activate another MH. Meanwhile, the prolonged strand is cleaved

by Nt.BstNBI and extended again. Such cyclic extension-cleavage event realizes the release of numerous ssDNA amplicons. The released ssDNA amplicon acts as primer for another template to trigger the next EXPAR. As shown in part B, this template contains two repeated antisense sequences of the released ssDNA amplicon and a C-rich domain with two specific fragments for Nt.BstNBI recognition. The amplicon-triggered secondary EXPAR can produce more amplicons for recycling and a large number of G-rich sequences to combine with hemin, which results in the formation of hemin/G-quadruplex DNAzymes catalyzing the oxidation of colorless ABTS<sup>2-</sup> to green ABTS<sup>•-</sup> with the presence of H<sub>2</sub>O<sub>2</sub>. The color change of the reaction solution is related to target concentration and respectively analyzed with a spectrophotometer and smartphone for dual quantification, followed by RGB analysis with the Color Recognizer APP (part C).

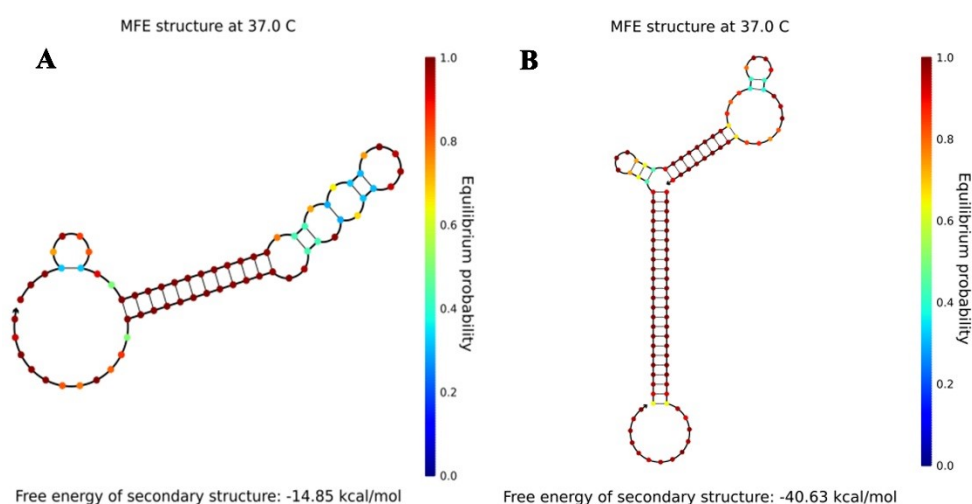

**Fig. S1.** Model of DNA secondary structures analysis. Minimum free energy (MFE) structure of (A) MH at 37 °C, (B) MH-target DNA interacting strands at a ratio 1:1 of MH and target DNA at 37 °C. The MFE structures were analyzed by NUPACK web server (<http://www.nupack.org/>). Copyright [Copyright © 2007-2021 Caltech. All rights reserved. <http://www.nupack.org/home/terms>].



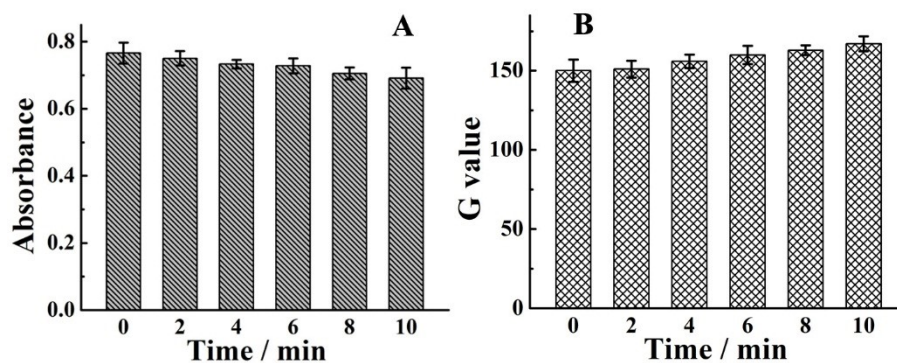

**Fig. S3.** (A) UV-Vis response intensities of this biosensor for the 5 pM target DNA detected every 2 min. (B) The corresponding respective G value of the images analyzed every 2 min.

**Table S2** Analytical performance of the proposed method compared with the reported nucleic acid detection methods.

| Detection method                    | Strategy                                                                          | Linear range | LOD     | Reference |
|-------------------------------------|-----------------------------------------------------------------------------------|--------------|---------|-----------|
| Fluorescence                        | Quenching effect of Ti <sub>3</sub> C <sub>2</sub> nanosheets on fluorescent dyes | 0.5~50 nM    | 100 pM  | 1         |
| Fluorescence                        | Isothermal helicase-dependent amplification                                       | 100 fM~10 nM | 12.8 fM | 2         |
| Electrochemistry                    | CNT-AuNP amplification                                                            | 0.1 pM~10 nM | 5.2 fM  | 3         |
| Electrochemistry                    | Based on gold-PET electrodes                                                      | 54~340 nM    | 25 nM   | 4         |
| Surface plasmon resonance           | Dynamic and structural DNA nanodevice amplification                               | 1 pM~150 nM  | 48 fM   | 5         |
| Surface enhanced Raman spectroscopy | DNA-silver metallization                                                          | 0.1 nM~1 μM  | 34 pM   | 6         |
| Colorimetry                         | The target-related dispersion/aggregation of Au nanorods                          | 0~60 nM      | 1.47 nM | 7         |
| Colorimetry                         | Palindromic molecule beacon-based cascade amplification                           | 10 pM~200 nM | 10 pM   | 8         |
| Electrochemiluminescence            | Au NPs@PDA@CuInZnS QDs nanocomposites                                             | 0.1~15 nM    | 0.03 nM | 9         |
| Electrochemiluminescence            | Based on DNA walkers and AuPd nanomaterials                                       | 100 aM~1 nM  | 31.9 aM | 10        |

|                                     |                                                            |                        |        |           |
|-------------------------------------|------------------------------------------------------------|------------------------|--------|-----------|
| RGB readout of fluorescence imaging | Based on PS@Au microspheres and duplex specific nuclease   | 1 pM~1 nM              | 50 fM  | 11        |
| Smartphone-integrated colorimetry   | Target-switched artificial biochemical circuit and DNAzyme | 5~5×10 <sup>4</sup> fM | 1.2 fM | This work |

**Table S3.** Target DNA determination in human serum samples with this method.

| Sample number | Added  | Detected by UV method | Recoveries (% , n=6) | Detected by smartphone | Recoveries (% , n=6) |
|---------------|--------|-----------------------|----------------------|------------------------|----------------------|
| 1             | 100 fM | 93.2 fM               | 93.2                 | 90.4 fM                | 90.4                 |
| 2             | 500 fM | 523.3fM               | 104.7                | 535.7 fM               | 107.1                |
| 3             | 3 pM   | 2.89 pM               | 96.3                 | 2.83 pM                | 94.3                 |

## References

- 1 X. Y. Peng, Y. L. Zhang, D. T. Lu, Y. J. Guo and S. J. Guo, *Sens. Actuators B: Chem.*, 2019, **286**, 222-229.
- 2 F. Ma, M. Liu, B. Tang and C. Y. Zhang, *Anal. Chem.*, 2017, **89**, 6182-6187.
- 3 S. Han, W. Y. Liu, M. Zheng and R. S. Wang, *Anal. Chem.*, 2020, **92**, 4780-4787.
- 4 H. A. M. Faria and V. Zucolotto, *Biosens. Bioelectron.*, 2019, **131**, 149-155.
- 5 W. Diao, M. Tang, S. Ding, X. Li, W. Cheng, F. Mo, X. Yan, H. Ma and Y. Yan, *Biosens. Bioelectron.*, 2018, **100**, 228-234.
- 6 Y. Qian, T. T. Fan, Y. Yao, X. Shi, X. J. Liao, F. Y. Zhou and F. L. Gao, *Sens. Actuators B: Chem.*, 2018, **254**, 483-489.
- 7 C. N. Xu, L. Y. Lan, Y. Yao, J. F. Ping, Y. B. Li and Y. B. Ying, *Sens. Actuators B: Chem.*, 2018, **273**, 642-648.
- 8 Z. F. Shen, F. Li, Y. F. Jiang, C. Chen, H. Xu, C. C. Li, Z. Yang and Z. S. Wu, *Anal.*



*Chem.*, 2018, **90**, 3335-3340.

9 Y. Liu, X. Q. Chen and Q. Ma, *Biosens. Bioelectron.*, 2018, **117**, 240-245.

10 Q. Wang, Y. Q. Liu, X. F. Wang, F. Y. Wang, L. N. Zhang, S. G. Ge and J. H. Yu, *ACS Appl. Mater. Interfaces*, 2021, **13**, 25783-25791.

11 Q. Zhao, J. F. Piao, W. P. Peng, Y. Wang, B. Zhang, X. Q. Gong and J. Chang, *ACS Appl. Mater. Interfaces*, 2018, **10**, 3324-3332.
